# Supplementary material for: Three new metastable polymorphs of 1-(9-anthryl)-2-(1-naphthyl)ethylene and the polymorph-dependent phase transition and fluorescence change properties
Source: Royal Society of Chemistry journal article supplement (doi:10.1039/c8ce01935e), 2019-01-01
Supplement: c8ce01935e1.pdf [file c8ce01935e1.pdf]

## Supporting Information

### Three New Metastable Polymorphs of 1-(9-Anthryl)-2-(1-naphthyl)ethylene and the Polymorph-Dependent Phase Transition and Fluorescence Change Property

Ye-Xin Li,\* Zhen-Feng Yu, Cun-Zhao Zhu, Xiao-Feng Yang, Yong Nie, Yu Cui and Guo-Xin Sun\*

#### General information

<sup>1</sup>H NMR spectra were conducted on a Bruker Avance 400 spectrometer. Differential scanning calorimetry (DSC) analyses were measured on Netzsch DSC 200F3 or Netzsch DSC 214 Polyma instrument. Thermogravimetric (TG) analyses were measured on a Netzsch5 instrument, in a flowing nitrogen atmosphere and with a 15 °C min<sup>-1</sup> to 450 °C. Single-crystal X-ray diffraction measurements were measured on a Bruker D8 Venture diffractometer with Ga K<sub>α</sub> radiation ( $\lambda = 1.34139 \text{ \AA}$ ). The absorption correction was applied using SADABS program.<sup>1</sup> The structure was solved by direct method and refined by a full-matrix least-squares technique on  $F^2$  using SHELXL-97 programs.<sup>2,3</sup> CCDC-1818417 (ANE-e) contains the supplementary crystallographic data for this paper. Powder X-ray diffraction (PXRD) investigations were carried out on a D8 Focus diffractometer equipped with Cu K<sub>α</sub> radiation ( $\lambda = 1.5406 \text{ \AA}$ ) using a XRD silicon holder. Profile fitting analyses were performed using TOPAS software.

All calculations were performed with the program package Gaussian 09.<sup>4</sup> The ground-state ( $S_0$ ) geometry was optimized in the gas phase using density functional theory (DFT) at the B3LYP/6-31G(d) level. Using the optimized ground-state geometry as initial structure, the first excited-state ( $S_1$ ) geometry was optimized



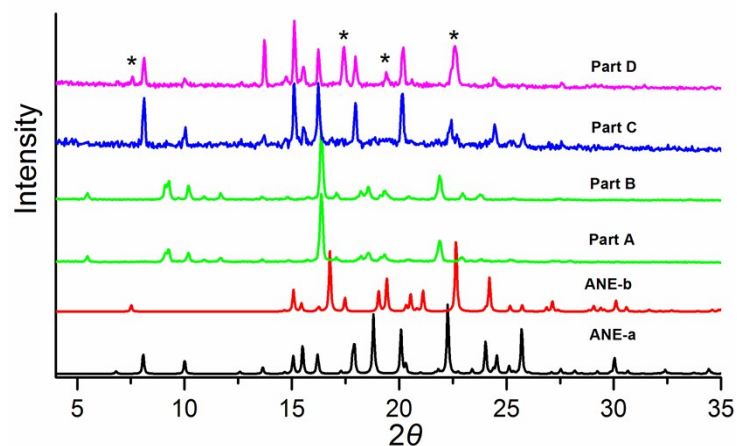

**Figure S2.** Photographs of ANE crystals grown from ethyl ether solution in a conical flask and the PXRD patterns of crystals in different part of the container. For comparison, the calculated diffraction spectra of ANE-a and ANE-b are also present.

As can be seen from the PXRD result, crystals from parts A and B are polymorph ANE-e. Crystals from part C are polymorph ANE-a. Crystals from part D are a mixture of polymorphs ANE-a and ANE-b. The diffraction peaks labelled with \* correspond to ANE-b.

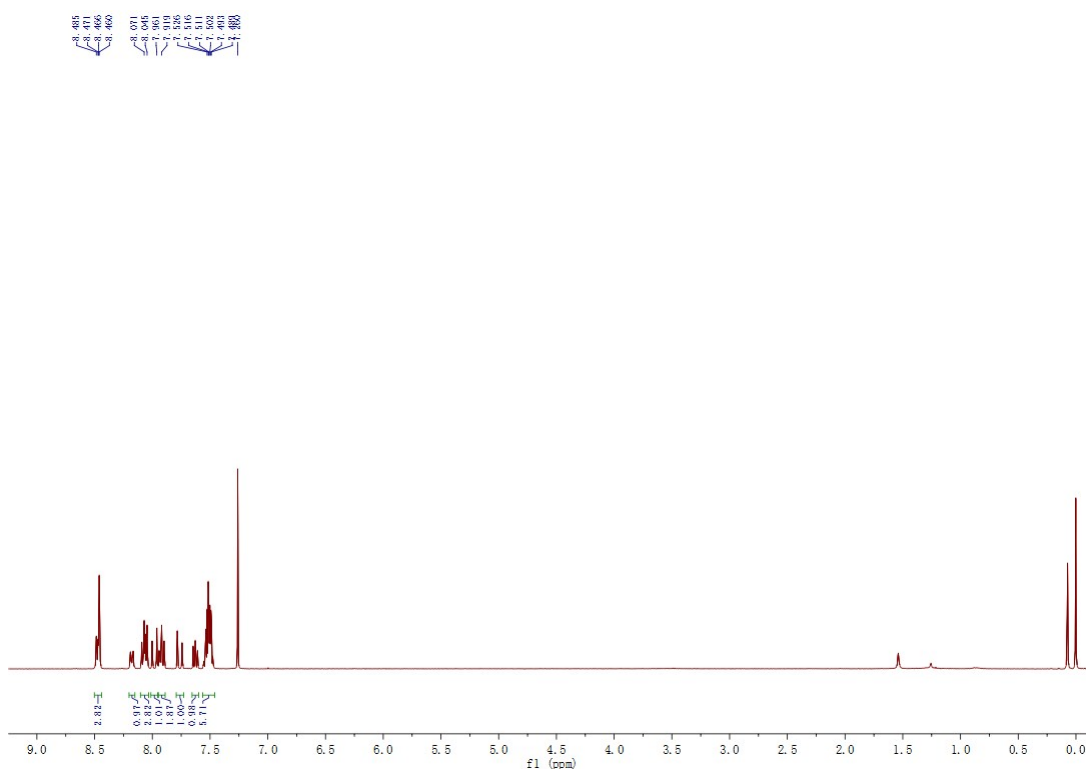

**Figure S3.** The  $^1\text{H}$  NMR spectrum of ANE-e in  $\text{CDCl}_3$  solution.

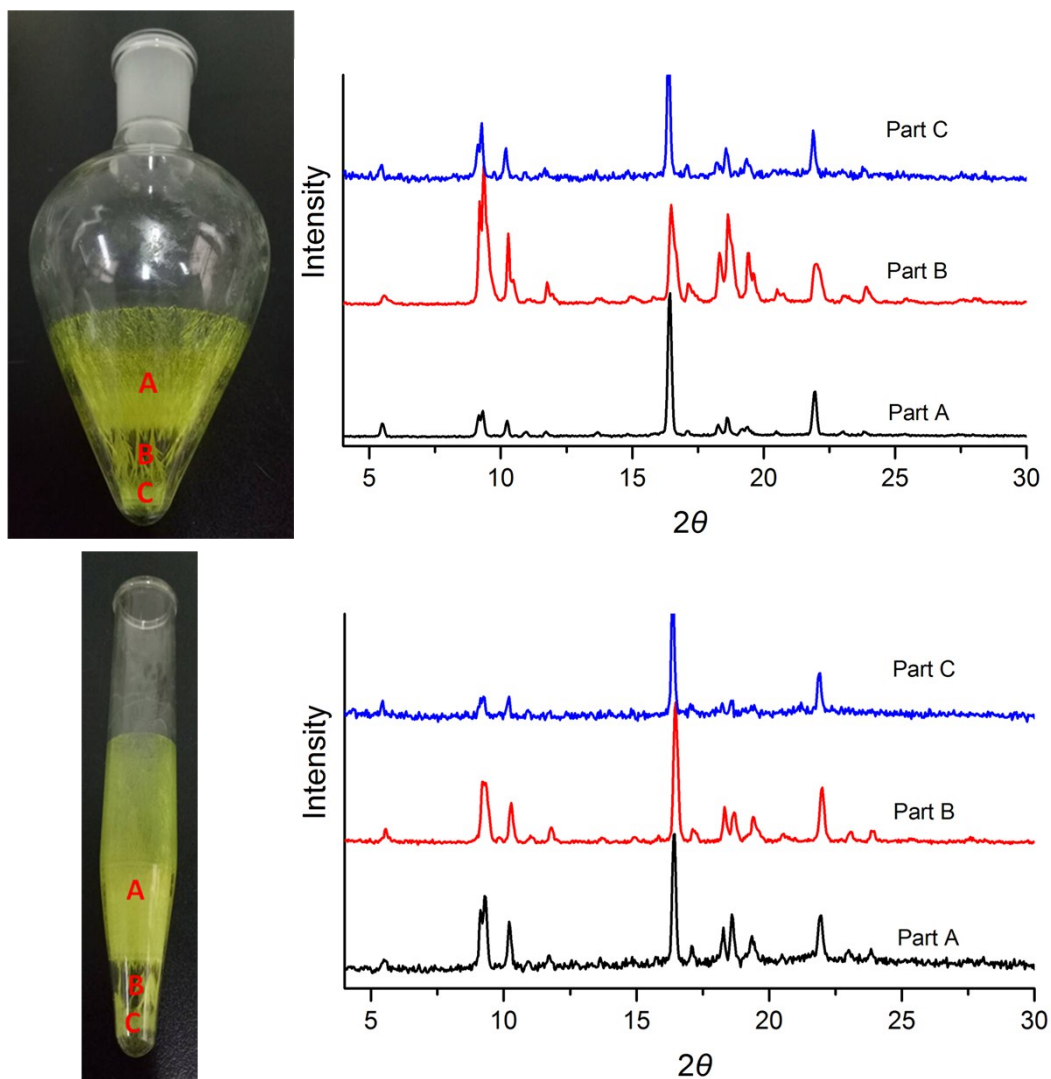

**Figure S4.** Photographs of ANE crystals grown from ethyl ether solution in pear-shaped flask and centrifuge tube. The PXRD patterns of crystals in different part of the container were measured. All the XRD patterns are in good agreement with ANE-e.

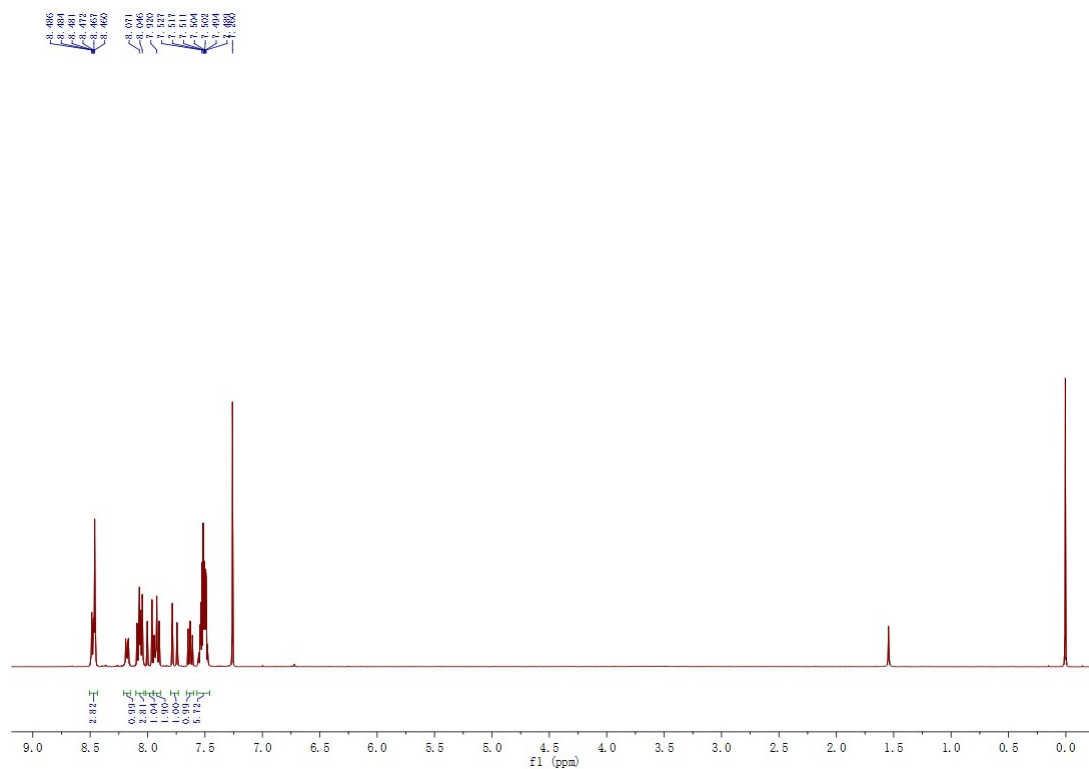

**Figure S5.** The  $^1\text{H}$  NMR spectrum of ANE-f in  $\text{CDCl}_3$  solution.

**Table S1.** The fluorescence lifetimes of ANE-d, ANE-e, and ANE-f.

| Compound | Lifetime(ns)         |
|----------|----------------------|
| ANE-d    | 0.91(61%), 3.26(39%) |
| ANE-e    | 1.19(60%), 3.86(40%) |
| ANE-f    | 1.36(41%), 3.07(59%) |

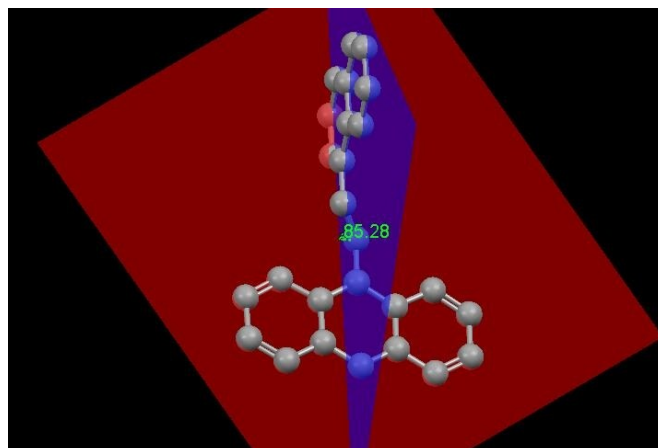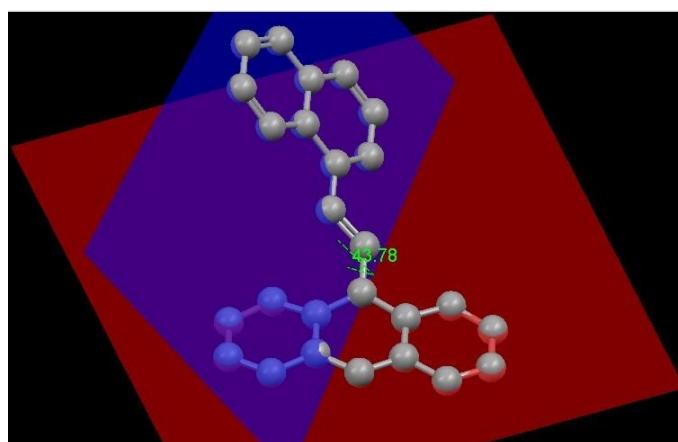

**Figure S6.** The calculated molecular structures of ANE in ground (upper) and first excited (lower) states.

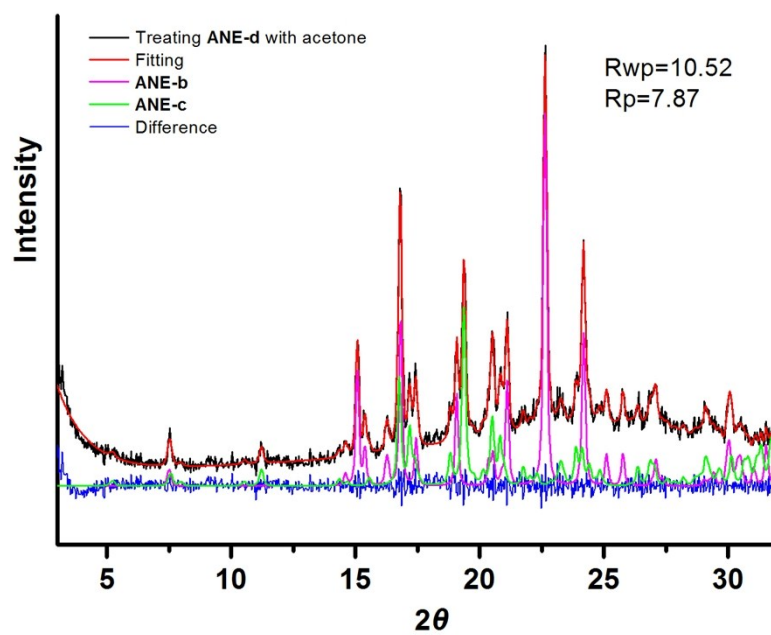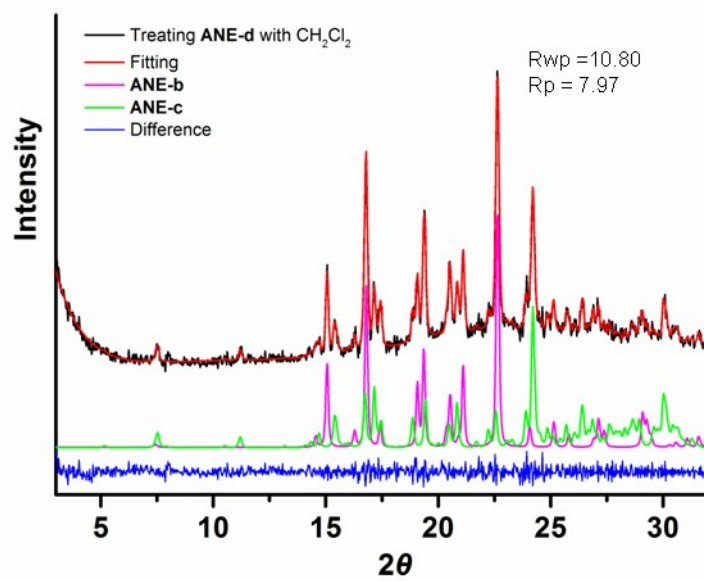

**Figure S7.** Profile fitting of the PXR D pattern of ANE-d sample after organic solvent vapour fuming.

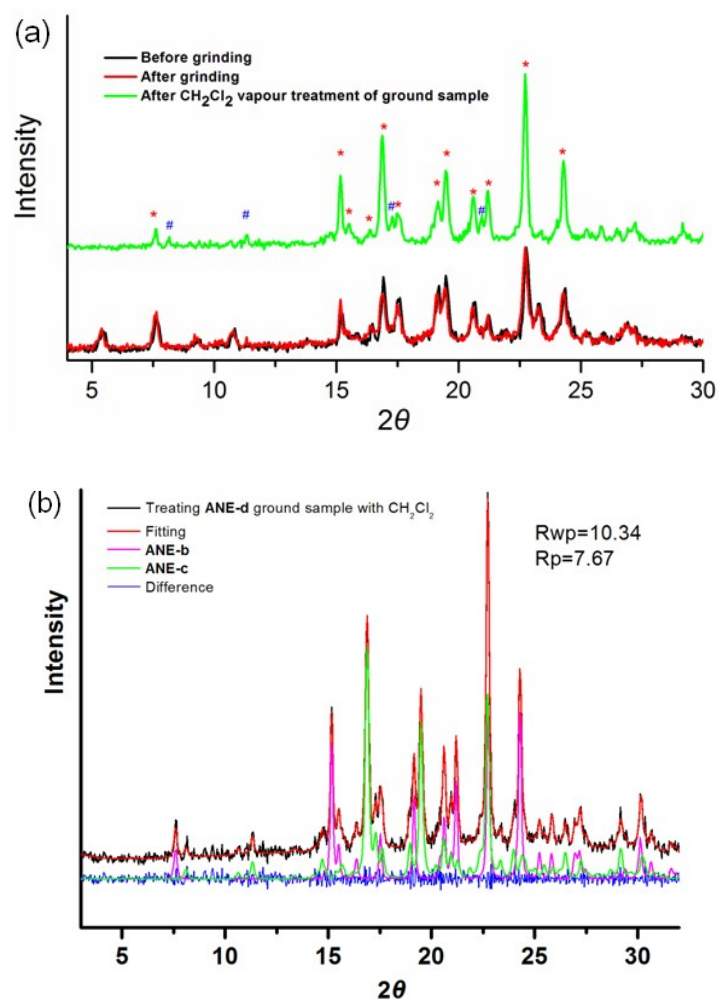

**Figure S8.** (a) XRD patterns of ANE-d sample with different treatment. The diffraction peaks labelled with \* belong to ANE-b. The diffraction peaks labelled with # correspond to ANE-c. (b) Profile fitting of the PXRD pattern of ANE-d ground sample after CH<sub>2</sub>Cl<sub>2</sub> fuming.

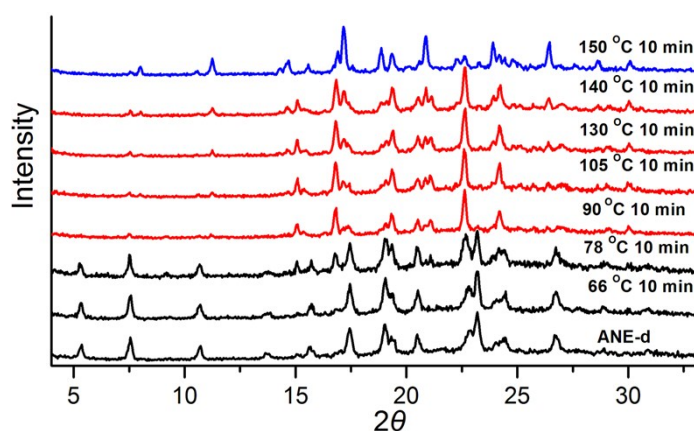

**Figure S9.** The change of XRD patterns with temperature upon heating ANE-d powder.



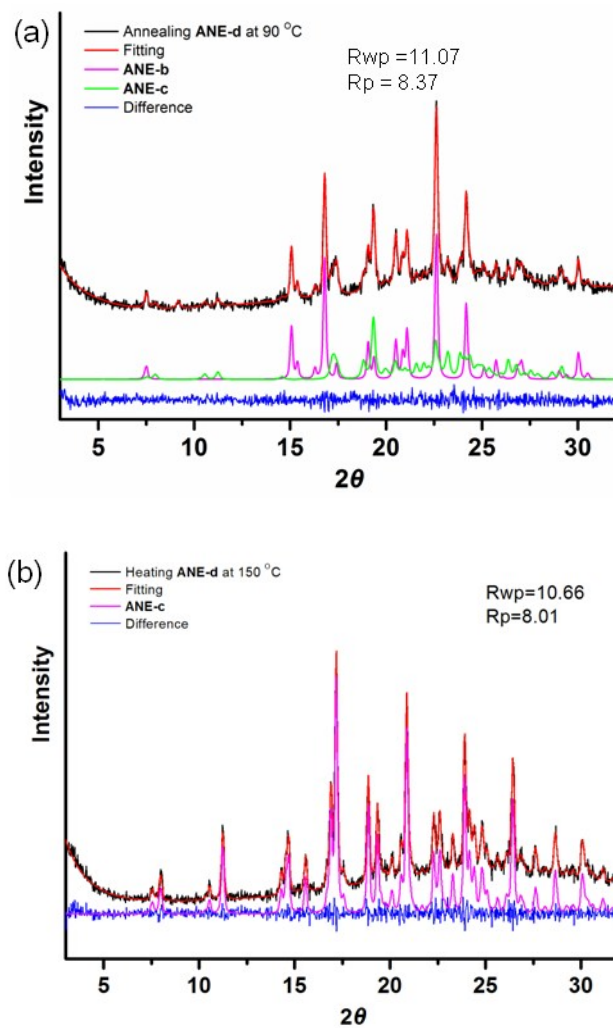

**Figure S10.** Profile fitting of the PXRD pattern of ANE-d sample after annealing at 90 °C (a) and 150 °C (b), respectively.

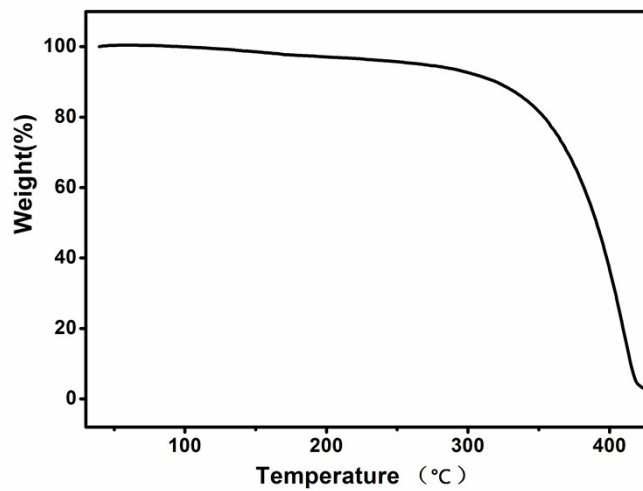

**Figure S11.** TG curves of ANE-d. The heating rate is 15 °C/min.

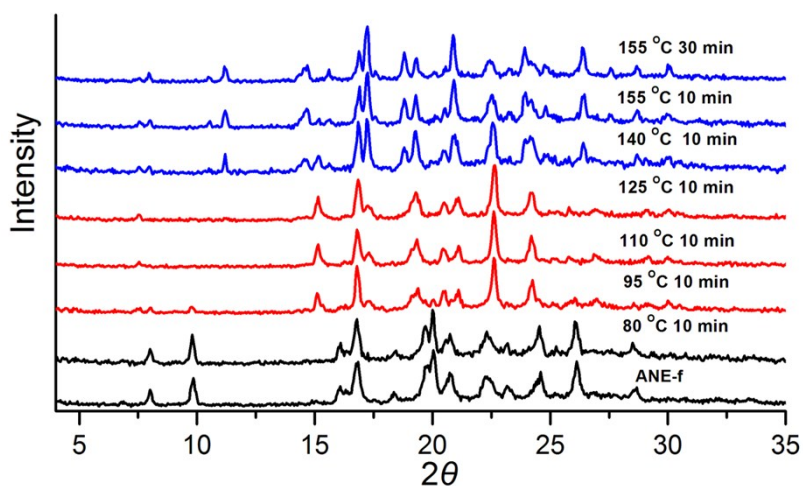

**Figure S12.** The change of PXRD pattern with temperature upon heating ANE-f sample.

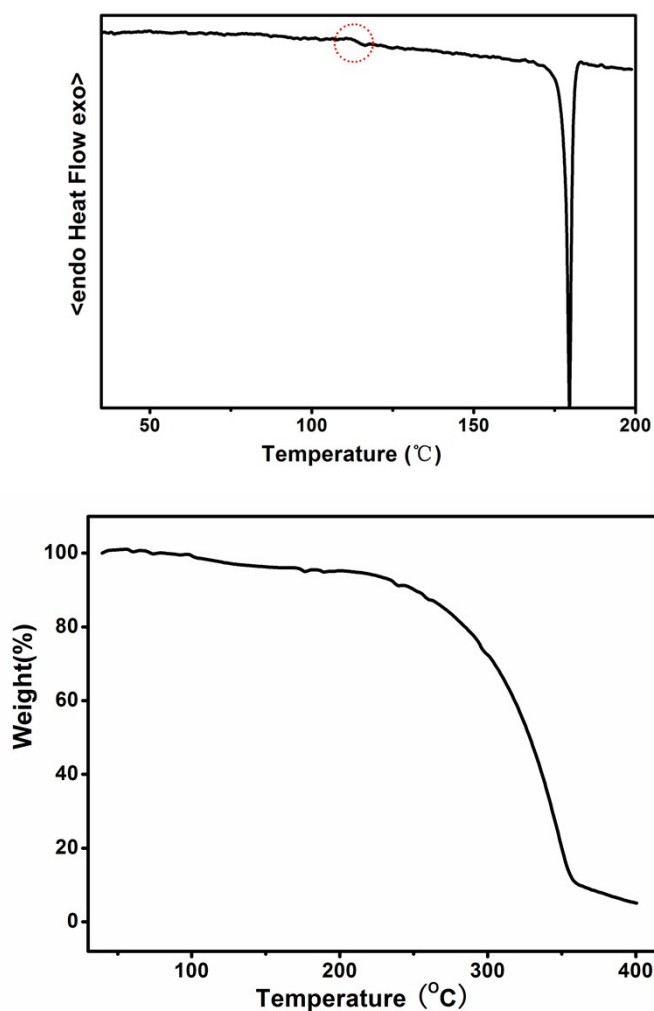

**Figure S13.** DSC and TG curves of ANE-f. The heating rate is 3 °C/min for DSC and 15 °C/min for TG measurement.

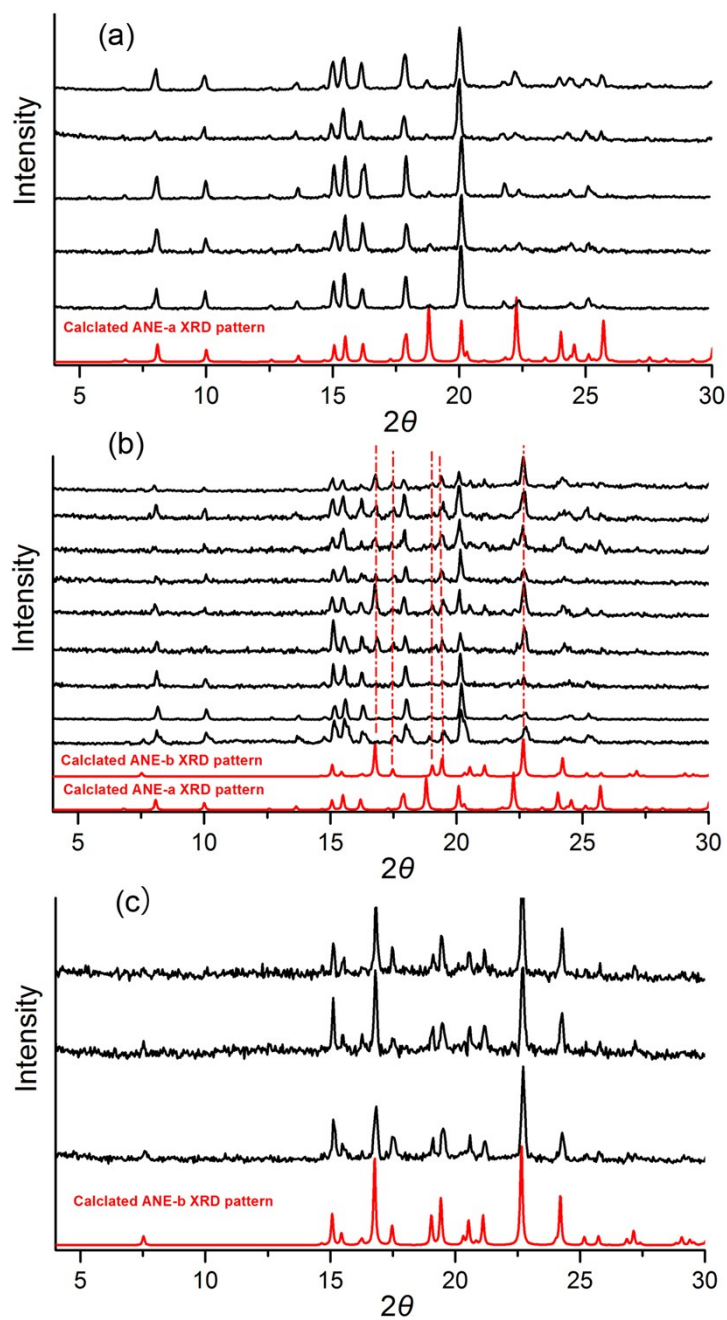

**Figure S14.** PXRD patterns of the seventeen batches of ANE-e crystal samples after treating with  $\text{CH}_2\text{Cl}_2$  vapour: (a) five batches of samples transform to ANE-a, (b) nine batches of samples convert to a mixture of ANE-a and ANE-b, and (c) three batches of samples transform to ANE-b. For comparison, the calculated diffraction spectra of ANE-a and ANE-b are also present.

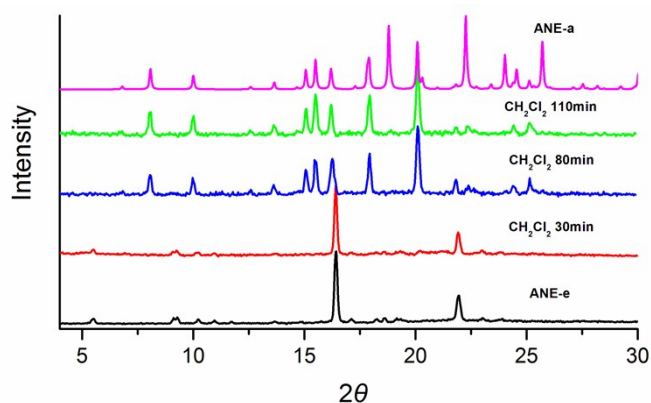

**Figure S15.** PXR D pattern change with time for as-grown **ANE-e** crystals during  $\text{CH}_2\text{Cl}_2$  vapour-mediated polymorphic transformation. For comparison, the calculated diffraction spectrum of **ANE-a** is present.

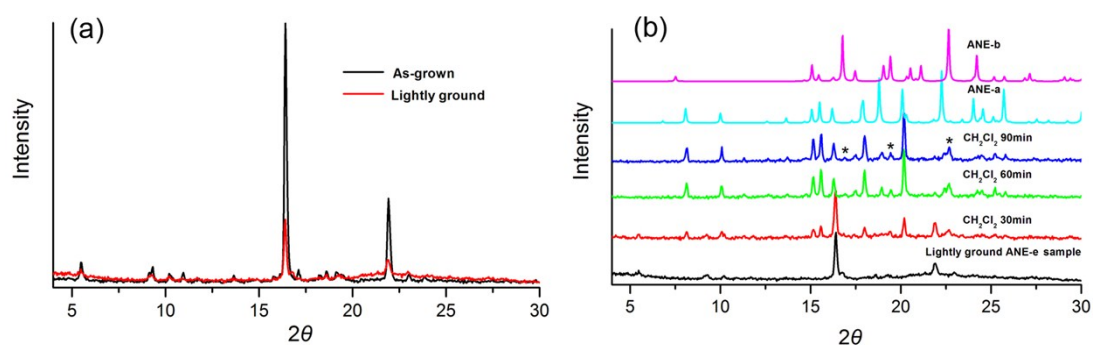

**Figure S16.** (a) PXR D patterns of **ANE-e** sample before and after lightly grinding. The as-grown crystal sample was ground directly on the XRD silicon holder. (b) PXR D pattern change with time for the lightly ground **ANE-e** sample during  $\text{CH}_2\text{Cl}_2$  vapour-mediated polymorphic transformation. For comparison, the calculated diffraction spectra of **ANE-a** and **ANE-b** are present. The characteristic diffraction peaks of **ANE-b** are labelled with \*.

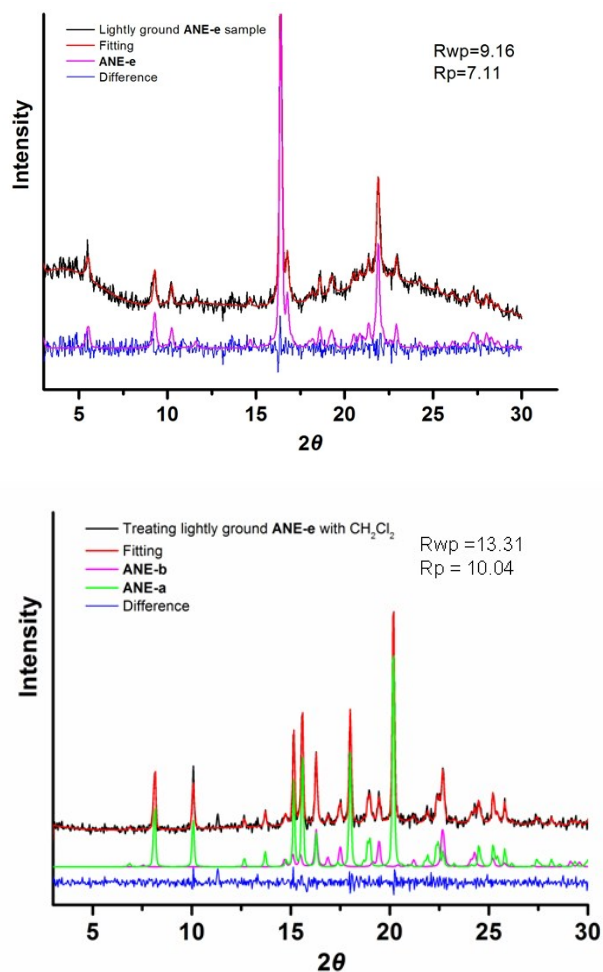

**Figure S17.** Profile fitting of the PXRD pattern of lightly ground ANE-e sample before and after  $\text{CH}_2\text{Cl}_2$  fuming.

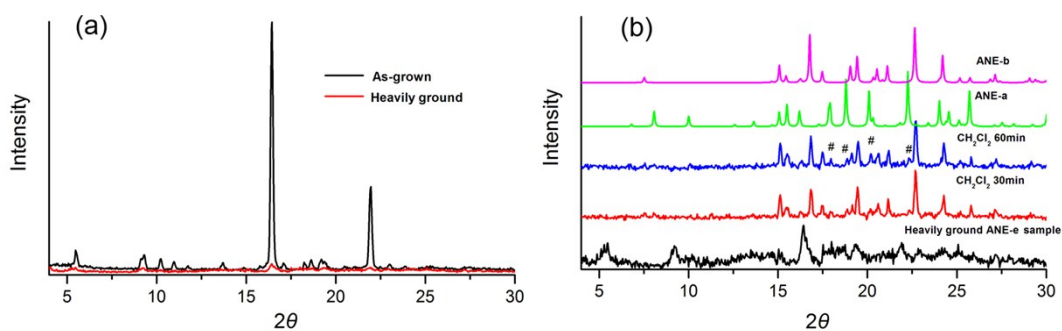

**Figure S18.** (a) The comparison of PXRD patterns of ANE-e sample before and after heavily grinding. The as-grown crystal sample was ground directly on the XRD silicon holder. (b) PXRD pattern change with time for heavily ground ANE-e sample during  $\text{CH}_2\text{Cl}_2$  vapour-mediated polymorphic transformation. For comparison, the calculated diffraction spectra of ANE-a and ANE-b are present. The characteristic diffraction peaks of ANE-a are labelled with #.

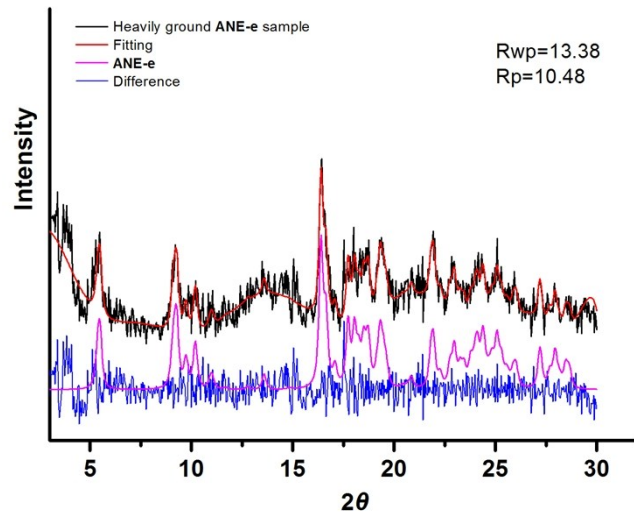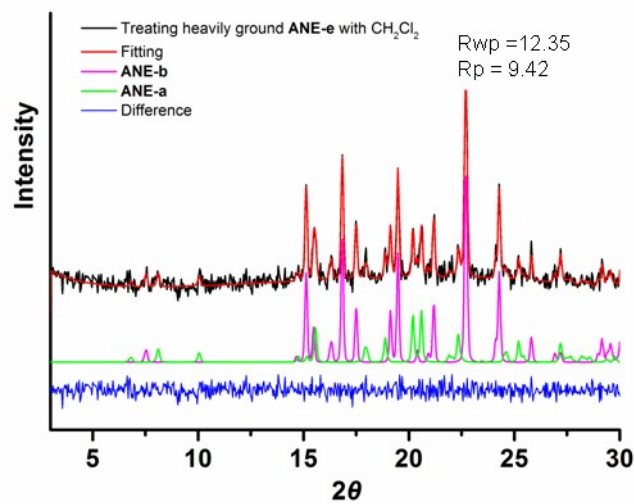

**Figure S19.** Profile fitting of the PXR D pattern of heavily ground ANE-e sample before and after CH<sub>2</sub>Cl<sub>2</sub> fuming.

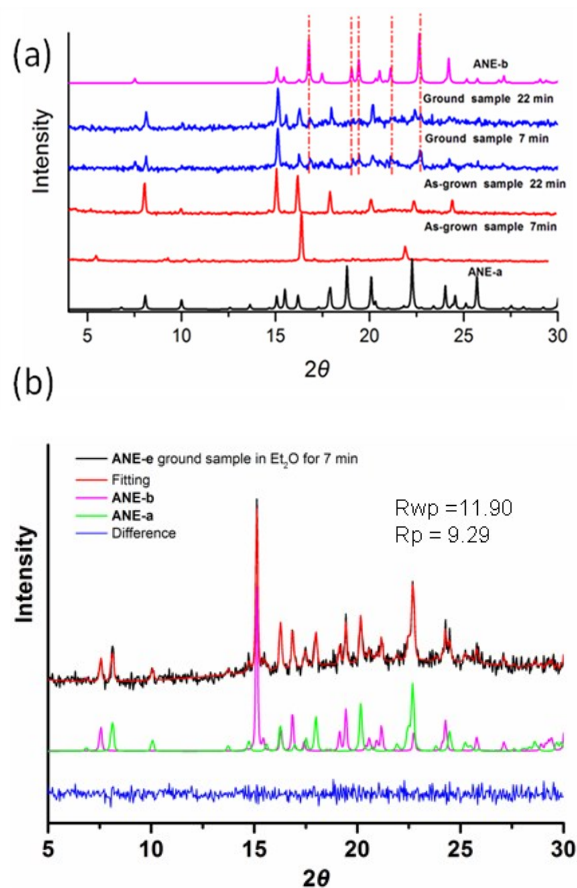

**Figure S20.** (a) PXRD pattern changes for ANE-e as-grown and ground samples extracted from saturated ethyl ether solution at different period of time. For comparison, the calculated diffraction spectra of ANE-a and ANE-b are also present. (b) Profile fitting of the PXRD pattern of ANE-e ground sample after dipping in ethyl ether solution for 7 minutes.

This solvent-mediated polymorphic transformation of polymorph ANE-e was carried out in ethyl ether saturated solution. A small amount of as-grown and ground samples (about 5 mg) were respectively dipped in saturated ethyl ether solution, which was sealed in a plastic centrifuge tube (volume 2 mL). After a certain period of time, the solution was removed and the solid was immediately detected by XRD. The ground sample transforms to a mixture of ANE-a and ANE-b within 7 minutes, while no phase transition was detected for the as-grown sample. The latter finally transforms to polymorph ANE-a after dipping for another 15 minutes.

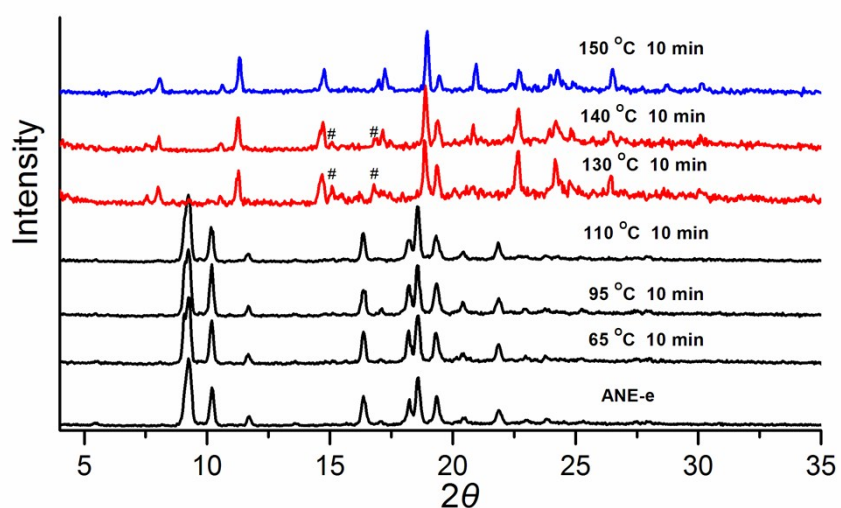

**Figure S21.** The change of XRD patterns with temperature upon heating ANE-e powder. The weak diffraction peaks at  $2\theta = 15.1$  and  $16.8^\circ$  (labeled with #) correspond to polymorph ANE-b.



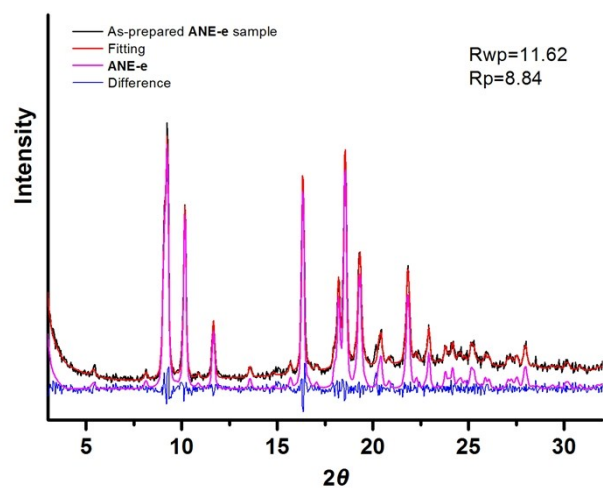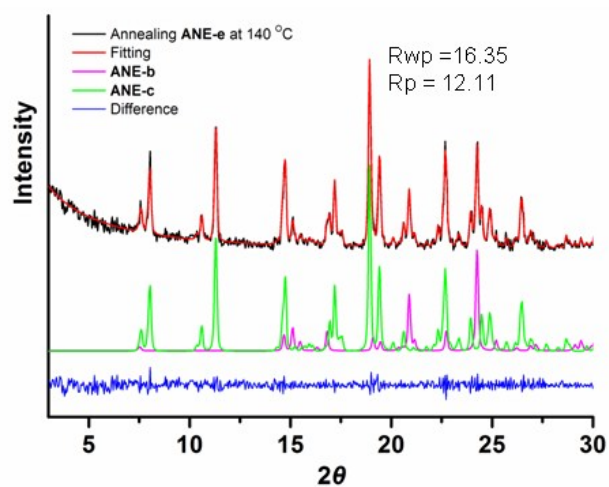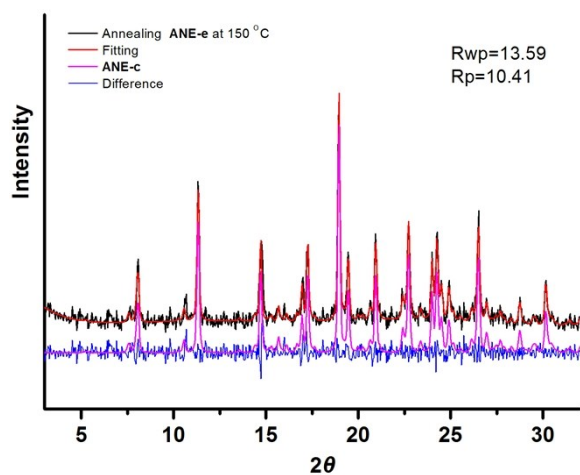

**Figure S22.** Profile fitting of the PXRD pattern of as-prepared ANE-e sample and ANE-e samples after annealing at 140 °C and 150 °C, respectively.

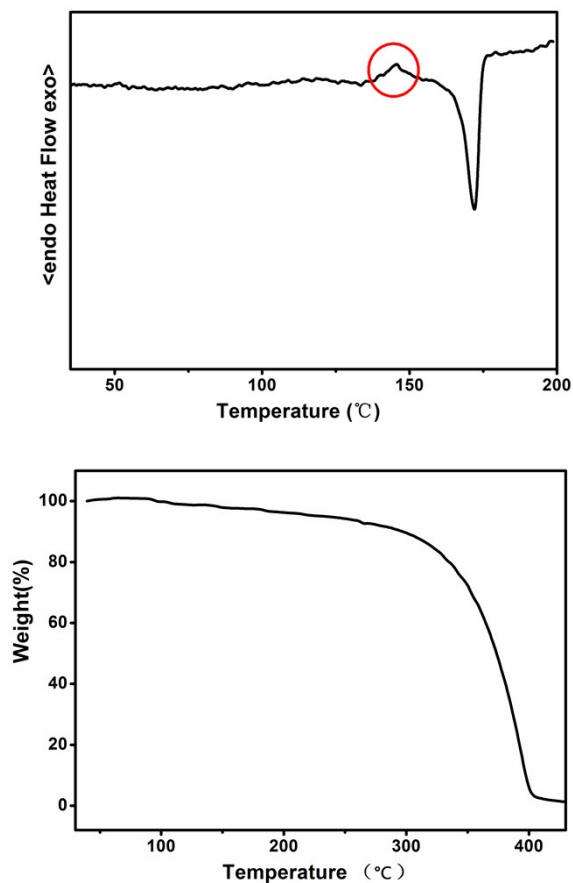

**Figure S23.** DSC and TG curves of ANE-e. The heating rate is 3 °C/min for DSC and 15 °C/min for TG measurement.

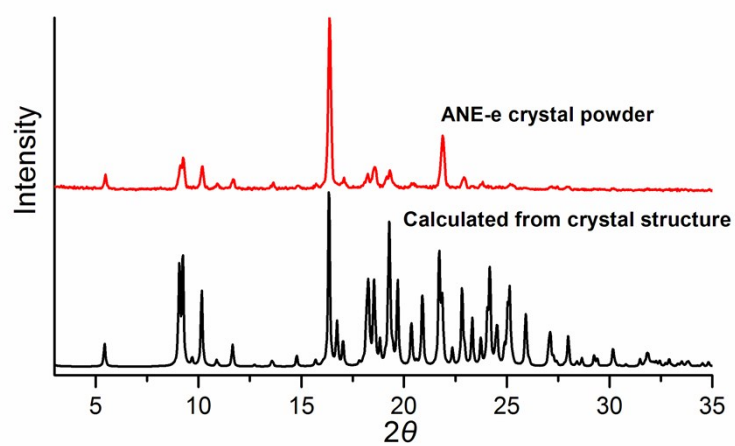

**Figure S24.** The PXRD patterns of ANE-e crystals and its simulated diffractogram based on single-crystal structure.

**Table S2.** The cell parameters of ANE-a, ANE-e, and ANE-b.

| Compound                                                                      | ANE-a                                                 | ANE-e                   | ANE-b                              |
|-------------------------------------------------------------------------------|-------------------------------------------------------|-------------------------|------------------------------------|
| CCDC number                                                                   | 885362                                                | 1818417                 | 885363                             |
| Chemical formula                                                              | C26H18                                                | C26H18                  | C13H9                              |
| Formula Mass                                                                  | 330.40                                                | 330.40                  | 165.20                             |
| Crystal system                                                                | Orthorhombic                                          | Monoclinic              | Monoclinic                         |
| <i>a</i> /Å                                                                   | 5.5771(3)                                             | 9.7845(147)             | 12.5169(17)                        |
| <i>b</i> /Å                                                                   | 12.0652(6)                                            | 5.5978(8)               | 6.1861(7)                          |
| <i>c</i> /Å                                                                   | 25.9356(12)                                           | 32.633(5)               | 12.2167(18)                        |
| $\alpha$ /°                                                                   | 90                                                    | 90.00                   | 90                                 |
| $\beta$ /°                                                                    | 90                                                    | 95.028(10)              | 110.239(15)                        |
| $\gamma$ /°                                                                   | 90                                                    | 90.00                   | 90                                 |
| Unit cell volume/Å <sup>3</sup>                                               | 1745.18(15)                                           | 1780.5(4)               | 887.5(2)                           |
| Space group                                                                   | <i>P</i> 2 <sub>1</sub> 2 <sub>1</sub> 2 <sub>1</sub> | <i>P</i> 2 <sub>1</sub> | <i>P</i> 2 <sub>1</sub> / <i>c</i> |
| Temperature/K                                                                 | 293(2)                                                | 296(2)                  | 293(2)                             |
| No. of formula units per unit cell, <i>Z</i>                                  | 4                                                     | 4                       | 4                                  |
| No. of reflections measured                                                   | 5686                                                  | 43681                   | 4208                               |
| No. of independent reflections                                                | 2083                                                  | 6700                    | 1815                               |
| <i>R</i> <sub>int</sub>                                                       | 0.0393                                                | 0.2351                  | 0.0212                             |
| Final <i>R</i> <sub>1</sub> values ( <i>I</i> > 2σ( <i>I</i> ))               | 0.0474                                                | 0.0799                  | 0.0617                             |
| Final <i>wR</i> ( <i>F</i> <sup>2</sup> ) values ( <i>I</i> > 2σ( <i>I</i> )) | 0.0858                                                | 0.1551                  | 0.1420                             |
| Final <i>R</i> <sub>1</sub> values (all data)                                 | 0.0870                                                | 0.2605                  | 0.1165                             |
| Final <i>wR</i> ( <i>F</i> <sup>2</sup> ) values (all data)                   | 0.0995                                                | 0.2312                  | 0.1743                             |
| Goodness of fit on <i>F</i> <sup>2</sup>                                      | 0.980                                                 | 0.960                   | 1.037                              |
| Flack parameter                                                               | -                                                     | 0(4)                    | -                                  |

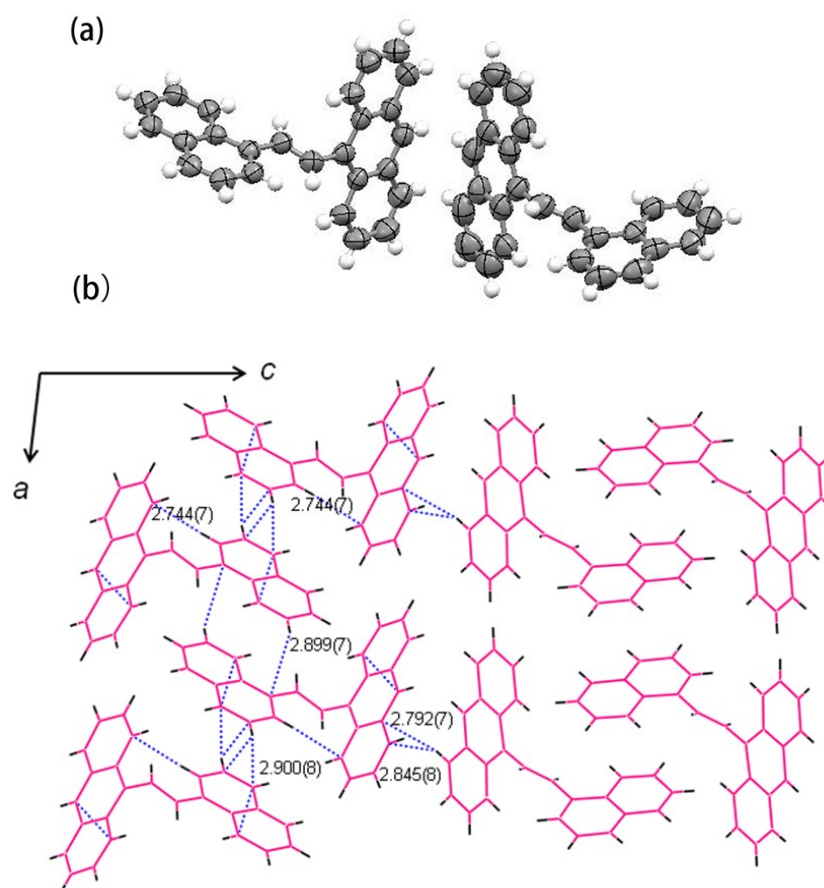

**Figure S25.** (a) The structures of two symmetry-independent molecules per asymmetric unit with thermal ellipsoids at the 50% probability level. (b) ANE-e molecules packing in the *ac* plane. The C–H... $\pi$  interactions are labelled by blue dotted line. The distance unit is Å.

#### References:

1. G. M. Sheldrick, *SADABS: An Empirical Absorption Correction Program for Area Detector Data*; University of Göttingen: Göttingen, Germany, **1996**.
2. G. M. Sheldrick, *Acta Crystallogr., Sect. A: Found. Crystallogr.* **2008**, *64*, 112-122.
3. O. V. Dolomanov, L. J. Bourhis, R. J. Gildea, J. A. K. Howard, H. Puschmann, *J. Appl. Crystallogr.* **2009**, *42*, 339-341.
4. M. J. Frisch, G. W. Trucks, H. B. Schlegel, G. E. Scuseria, M. A. Robb, J. R.

Cheeseman, G. Cheeseman, V. Barone, B. Mennucci, G. A. Petersson, H. Nakatsuji, M. Caricato, X. Li, H. P. Hratchian, A. F. Izmaylov, J. Bloino, G. Zheng, J. L. Sonnenberg, M. Hada, M. Ehara, K. Toyota, R. Fukuda, J. Hasegawa, M. Ishida, T. Nakajima, Y. Honda, O. Kitao, H. Nakai, T. Vreven, J. A. Montgomery, J. J. E. Peralta, F. Ogliaro, M. Bearpark, J. J. Heyd, E. Brothers, K. N. Kudin, V. N. Staroverov, R. Kobayashi, J. Normand, K. Raghavachari, A. Rendell, J. C. Burant, S. S. Iyengar, J. Tomasi, M. Cossi, N. Rega, J. M. Millam, M. Klene, J. E. Knox, J. B. Cross, V. Bakken, C. Adamo, J. Jaramillo, R. Gomperts, R. E. Stratmann, O. Yazyev, A. J. Austin, R. Cammi, C. Pomelli, J.W. Ochterski, R. L. Martin, K. Morokuma, V. G. Zakrzewski, G. A. Voth, P. Salvador, J. Dannenberg, S. Dapprich, A. D. Daniels, O. Farkas, J. B. Foresman, J. V. Ortiz, J. Cioslowski, D. J. Fox, *Gaussian 09*, Revision A.02. Wallingford CT: Gaussian, Inc; 2009.
